# Supplementary material for: Predictive Markers of Efficacy for an Angiopoietin-2 Targeting Therapeutic in Xenograft Models
Source: PubMed Central journal article supplement (PMC3828186; doi:10.1371/journal.pone.0080132), 2013-11-14
Supplement: pone.0080132.s001.pdf [file pone.0080132.s001.pdf]

## Least Angle Regression for prediction of continuous response

### Description of the problem:

Column of description sheet defining response variable: TGI

number of filtered genes 5

% error threshold: 0

Algorithm used: LAR (least angle regression)

Inclusion of 2 way interaction: No

Cross-validation type: 10 fold

Column of the Experiment Descriptors sheet that defines training/prediction variable: Set

### Prediction model

The prediction of new samples can be calculated by the formula:  $\sum_i c_i x_i + 86.765$  where  $c_i$  and  $x_i$  are the coefficient and gene expression for the  $i$ -th gene, respectively. The gene expression is the (normalized) log ratios for dual-channel data and log intensities for single-channel data. If two way interaction option is selected, each gene expression has to be subtracted by a constant defined below and  $x_i$  can be either an individual gene expression or a product of two gene expression.

|   |         | Coefficient |
|---|---------|-------------|
| 1 | Angpt1  | -2.159      |
| 2 | EGF     | -1.03       |
| 3 | EMMPRIN | -5.822      |

### Scatterplot of the actual response vs the predicted response from the cross-validation

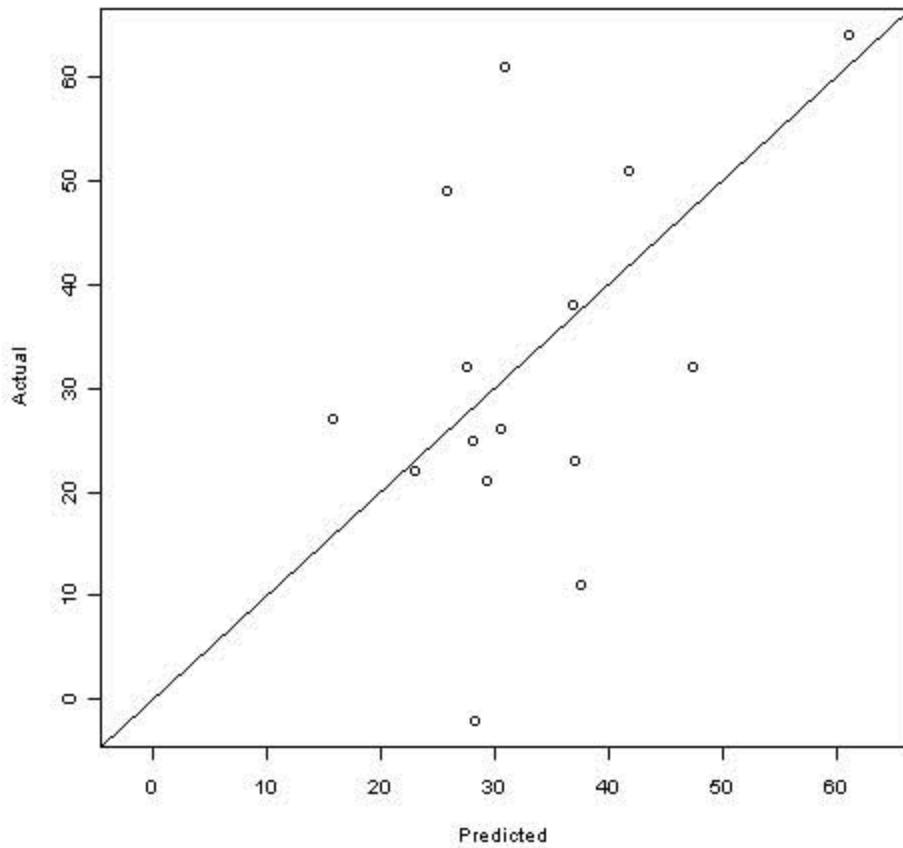

|         | Predicted | Actual |
|---------|-----------|--------|
| OVCAR5  | 28.286    | -2     |
| Caki1   | 30.503    | 26     |
| ES2     | 37.609    | 11     |
| HeyC2   | 29.354    | 21     |
| HT29    | 15.761    | 27     |
| A498    | 23.004    | 22     |
| A2780   | 27.516    | 32     |
| G401    | 47.455    | 32     |
| IGROV1  | 37.019    | 23     |
| SN12CCP | 28.185    | 25     |
| OVX276  | 36.915    | 38     |
| OV90    | 41.868    | 51     |
| colo205 | 61.221    | 64     |
| SKOV3   | 25.835    | 49     |
| OVX243  | 30.896    | 61     |

The  $R^2$  for the model is: 0.19

## 10-fold cross-validated mean squared error curve

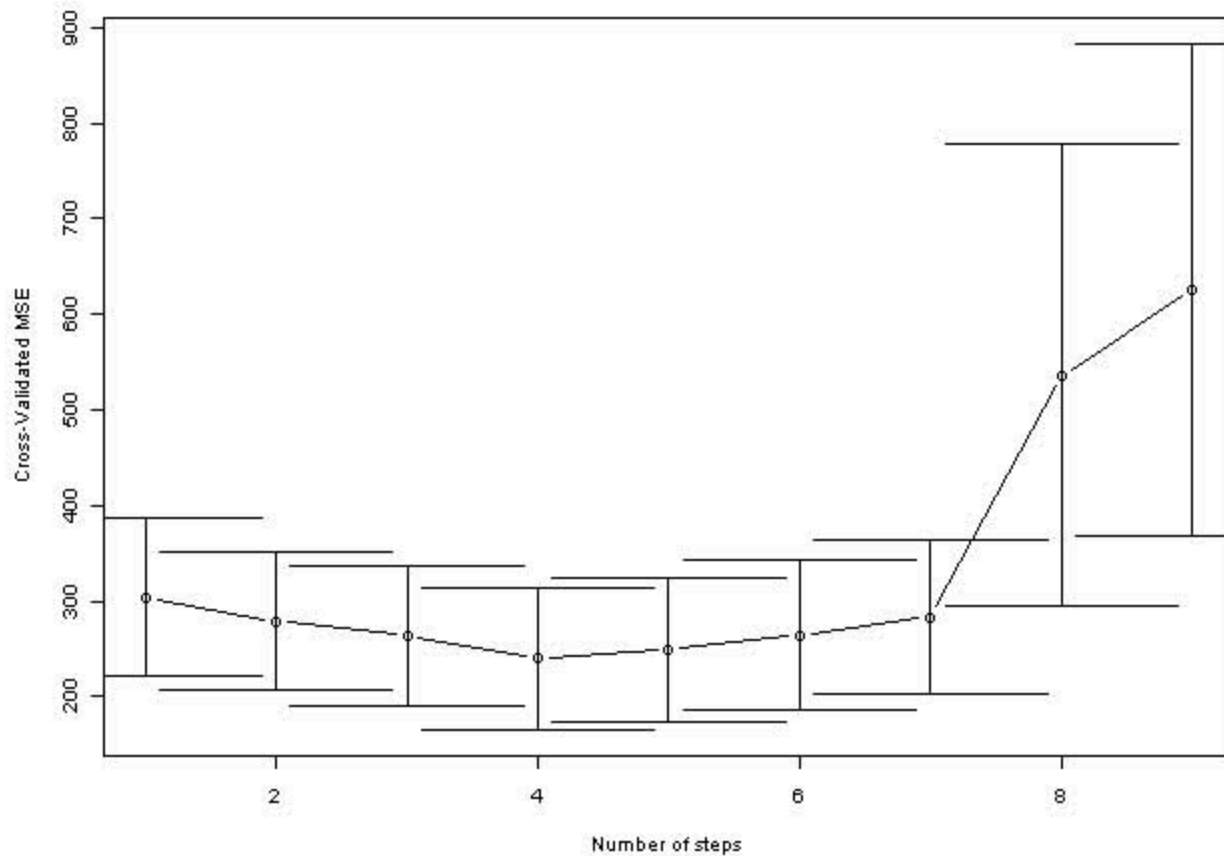

The x-axis stands for the algorithmic steps relative to the model containing  $n$  genes. The y-axis stands for a cross-validated estimate of the squared prediction error for each step. The standard error bands are included for the standard error of the CV curve at each step.

Click [here](#) to view expression of significant genes

## Quantitative trait predictions of new samples:

| Array id  | Prediction |
|-----------|------------|
| A549      | 49.709     |
| A431      | 30.476     |
| MDA.MB435 | 44.494     |
| U87.MG    | 44.796     |
| D45MG     | 27.521     |

|                 |        |
|-----------------|--------|
| <b>U251</b>     | 17.633 |
| <b>NCIH441</b>  | 23.653 |
| <b>SHP77</b>    | 31.415 |
| <b>SKMEL1</b>   | 28.184 |
| <b>NCI.H209</b> | 30.294 |
| <b>NCI.H720</b> | 27.904 |

---

**Filtering parameters:**

R version 2.13.2 (2011-09-30)

Name of the project file: Project.xls

Time of the analysis: Tue Jun 12 12:48:43 2012

BRB-ArrayTools Version: 4.2.1 - Stable Release

- **Spot Filters: OFF**
- **Average the replicate spots within an array: OFF**
- **Normalization: OFF**
- **Gene Filters: OFF**
- **Gene Subsets: OFF**
